# Supplementary material for: Genomics of Flower Identity in Grapevine (Vitis vinifera L.)
Source: Front Plant Sci. 2019 Mar 21;10:316. doi: 10.3389/fpls.2019.00316 (PMC6437108; doi:10.3389/fpls.2019.00316)
Supplement: Supplementary file 1 [file Table_1.XLSX]

## Sheet: Foglio1
			Gene Class	Grapevine Gene	PN40024 v1 ID	Arabidopsis Locus	Arabidopsis Gene
			Class A	VviAP1	VIT_01s0011g00100	AT1G26310, CAL/CAL1/AGL10 AT1G69120, AP1/AGL7 AT5G60910, AGL8/FUL	AP1
				VviFUL1	VIT_17s0000g04990	AT5G60910 AGL8 FUL	FUL
				VviFUL2	VIT_14s0083g01030	AT5G60910, AGL8/FUL	FUL
			Class B	VviAP3a	VIT_18s0001g13460	AT3G54340, AP3/ATAP3	AP3
				VviAP3b	VIT_04s0023g02820	AT3G54340, AP3/ATAP3	AP3
				VviPI	VIT_18s0001g01760	AT5G20240, PI	PI
				VviABS1	VIT_10s0042g00820	AT5G23260, TT16/ABS/AGL32	ABS
				VviABS2	VIT_01s0011g01560	AT5G23260, TT16/ABS/AGL32	ABS
				VviABS3	VIT_02s0025g02350	AT5G23260, TT16/ABS/AGL32	ABS
			Class C	VviSHP1	VIT_12s0142g00360	AT2G42830,AT3G58780	SHP1
				VviSHP2	VIT_10s0003g02070	AT2G42830,AT3G58780	SHP2
			Class D	VviAG3/VviSTK	VIT_18s0041g01880	AT4G09960, STK/AGL11	STK
			Class E	VviSEP1	VIT_14s0083g01050	AT3G02310, SEP2/AGL4 AT5G15800, SEP1/AGL2	SEP1
				VviSEP2	VIT_17s0000g05000	AT2G03710, SEP4/AGL3	SEP2
				VviAGL6a	VIT_15s0048g01270	AT2G45650, AGL6 AT3G61120, AGL13	AGL6
				VviAGL6b	VIT_16s0022g02330	AT2G45650, AGL6 AT3G61120, AGL13	AGL6

## Sheet: Foglio2
Gene Class	Grapevine Locus	Arabidopsis Locus	Grapevine Gene	Arabidopsis Gene
A	VIT_01s0011g00100	AT1G26310 CAL/CAL1/AGL10 AT1G69120 AP1 AGL7 AT5G60910 AGL8 FUL	VviAP1	AP1
	VIT_17s0000g04990	AT5G60910 AGL8 FUL	VviFUL1	FUL
	VIT_14s0083g01030	AT5G60910 AGL8 FUL	VviFUL2	FUL
B	VIT_18s0001g13460	AT3G54340 AP3 ATAP3	VviAP3a	AP3
	VIT_04s0023g02820	AT3G54340 AP3 ATAP3	VviAP3b	AP3
	VIT_18s0001g01760	AT5G20240 PI	VviPI	PI
	VIT_10s0042g00820	AT5G23260 TT16 ABS AGL32	VviABS1	ABS
	VIT_01s0011g01560	AT5G23260 TT16 ABS AGL32	VviABS2	ABS
	VIT_02s0025g02350	AT5G23260 TT16 ABS AGL32	VviABS3	ABS
C	VIT_12s0142g00360	AT2G42830/AT3G58780	VviSHP1	SHP1
	VIT_10s0003g02070	AT2G42830/AT3G58780	VviSHP2	SHP2
D	VIT_18s0041g01880	AT4G09960 STK AGL11	VviAG3/VviSTK	STK
E	VIT_14s0083g01050	AT3G02310 SEP2 AGL4 AT5G15800 SEP1 AGL2	VviSEP1	SEP1
	VIT_17s0000g05000	AT2G03710 SEP4 AGL3	VviSEP2	SEP2
	VIT_15s0048g01270	AT2G45650 AGL6 AT3G61120 AGL13	VviAGL6a	AGL6
	VIT_16s0022g02330	AT2G45650 AGL6 AT3G61120 AGL13	VviAGL6b	AGL6
Housekeeping	VIT_08s0040g00040	AT1G64230	VviUBC	UBC

## Sheet: Foglio3
Table S1. List of gene specific oligonucleotides used in this study for RT qPCRs
Gene Class	Grapevine Locus	Grapevine Gene		Primer Sequence (5'->3')
A	VIT_01s0011g00100	VviAP1	Forward	TGGAGCAAGGAGGAATGAGC
			Reverse	CGTCGTGAAGCATCCAAGGT
	VIT_17s0000g04990	VviFUL1	Forward	GGACCTGGACTCACCATCCT
			Reverse	TAACATGGCGCAGCATCCAA
	VIT_14s0083g01030	VviFUL2	Forward	TCATCTGCCTATGTGGTGCC
			Reverse	TGGGACTAGGTCGAGCTTCA
B	VIT_18s0001g13460	VviAP3a	Forward	AGCTCTCCGGTATTTGCCCT
			Reverse	GGTCAAATCAGAGCCCACAC
	VIT_04s0023g02820	VviAP3b	Forward	GAATCAGCGGTGGCATTCG
			Reverse	GATTAGGGTGGGCCTGATGC
	VIT_18s0001g01760	VviPI	Forward	TCAGAGAGCTGTGAGGGACT
			Reverse	AAGTTTGGCTGAATTGGCTGC
B-sister	VIT_10s0042g00820	VviABS1	Forward	GAGAACCGAGCAGCCTTAGA
			Reverse	GTGGGGTTGAGTGAGCTGAA
	VIT_01s0011g01560	VviABS2	Forward	TTCTACCCCTATCGCCTCCA
			Reverse	AGTGCCTATGGAGCCAAATCC
	VIT_02s0025g02350	VviABS3	Forward	TGGGCTCAAGAGGGACAAAC
			Reverse	TGGGTGAAACTGAGGAGGGA
C	VIT_12s0142g00360	VviAG1	Forward	AATGAGAGAGCCCAACAGCAA
			Reverse	TTGGTCGTGGCGAGAGTAAT
	VIT_10s0003g02070	VviAG2	Forward	ACGAACAGCAGATGAGCTTGA
			Reverse	AGAGTCGAACTGCTGAGATGG
	VIT_15s0048g01270	VviAGL6a	Forward	AGCTTCCCTGTGCATCCTTC
			Reverse	TGAAGTTGCTCTCACCAGCC
	VIT_16s0022g02330	VviAGL6b	Forward	CGAATTTGTTCCACCGGAAGG
			Reverse	AAACAAGCCATCCTTGGGCG
D	VIT_18s0041g01880	VviAG3	Forward	GAGTTCAATGCCATCCAGGC
			Reverse	TTACCCGAGATGGAGGACCTT
E	VIT_14s0083g01050	VviSEP1	Forward	CCACCAGCAAGCTCAGTCTC
			Reverse	CAAAGCATCCACCCAGGGATA
	VIT_17s0000g05000	VviSEP2	Forward	TCCTGCTCAATCAGAGGGGT
			Reverse	ATCCATCCGGGGCCAAATC
	VIT_01s0010g03900	VviSEP3	Forward	CACAAGACGTGGGCTATGGT
			Reverse	CGGGCTGGTATCCGATTTGT
	VIT_01s0011g00110	VviSEP4	Forward	CGAGCCTGTTCAGTCAGAGG
			Reverse	CAAACCATCCACCCAGGGAT
UBIQUITIN	VIT_08s0040g00040	VviUBQ	Forward	GAGGGTCGTCAGGATTTGGA
			Reverse	GCCCTGCACTTACCATCTTTAAG
